# Supplementary material for: Hydromorphological attributes for all Australian river reaches derived from Landsat dynamic inundation remote sensing
Source: Copernicus journal article supplement (doi:10.5194/essd-2019-26), 2019-02-20
Supplement: Supplementary file [file essd-2019-26-RC1-supplement.pdf]

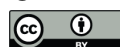

# Hydromorphological attributes for all Australian river reaches derived from Landsat dynamic inundation remote sensing

Jiawei Hou<sup>1</sup>, Albert I.J.M. van Dijk<sup>1</sup>, Luigi J. Renzullo<sup>1</sup>, Robert A. Vertessy<sup>1,2</sup>, Norman Mueller<sup>3</sup>

<sup>1</sup>Fenner School of Environment and Society, Australian National University, Canberra, Australian Capital Territory, Australia

<sup>2</sup>School of Engineering, University of Melbourne, Melbourne, Victoria, Australia

<sup>3</sup>Geoscience Australia, GPO Box 378, Canberra, Australian Capital Territory, Australia

Correspondence to: Jiawei Hou ([jiawei.hou@anu.edu.au](mailto:jiawei.hou@anu.edu.au))

**Abstract.** Hydromorphological attributes such as flow width, water extent and gradient play an important role in river hydrological, biogeochemical and ecological processes, helping to predict river conveyance capacity, discharge and flow routing. While there are some river width datasets at global or regional scales, they do not consider temporal variation in river width and do not cover all Australian rivers. We combined detailed mapping of 1.4 million river reaches across the Australian continent with inundation frequency mapping from 27 years of Landsat observations. From these, the average flow width at different recurrence frequencies was calculated for all reaches, having a combined length of 3.3 million km. A parameter  $\gamma$  was proposed to describe the shape of the frequency-width relationship and can be used to classify reaches by the degree to which flow regime tends towards permanent, frequent, intermittent or ephemeral. Proposed scaling rules relating river width to gradient and contributing catchment area and discharge were investigated, demonstrating that such rules capture relatively little of real-world variability. Uncertainties mainly occur in multi-channel reaches and reaches with unconnected water bodies. The calculated reach attributes are easily combined with the river vector data in GIS, which should be useful for research and practical applications such as water resource management, aquatic habitat enhancement, and river engineering and management. The dataset is available at <http://dx.doi.org/10.25914/5c637a7449353> (Hou et al. 2019).

## 1. Introduction

Temporal and spatial information on river morphology is fundamental for understanding bedrock lithology, CO<sub>2</sub> and nutrient exchange, aquatic habitat distribution and migration, managing fishery, transportation and flooding hazards, and developing hydrologic and hydrodynamic models (Miller et al., 2014). River morphology is mainly controlled by eight variables: width, gradient, depth, velocity, discharge, roughness, sediment size and sediment load (Leopold et al., 1964). In the longitudinal dimension, river patterns have been categorized as either single or anabranching channels. Laterally, active channels and inactive channels can be further classified as straight, sinuous, meandering and braided forms (Nanson and Knighton, 1996). For a deeper understanding of river morphology, Rosgen (1994) established a river classification inventory system using



delineation criteria or ranges in different levels including the number of channels, entrenchment, width-depth ratio, sinuosity, gradient, and channel material. Importantly, the interaction between river channel and floodplain results in different river morphology. For instance, the width of channel changes in response to formation and destruction of the floodplain, which subsequently alters bar patterns as  dominated by width-depth ratio (Kleinhans and Van den Berg, 2011).

5

Among the variables affecting river morphology, river width is an essential parameter to calculate river discharge, assess river conveyance capacity, and improve river routing in models (Yamazaki et al., 2014). River width at overbank flow level plays a significant role in delineating flooding area, which affects water vapour fluxes and groundwater recharge (Dadson et al., 2010; Pedinotti et al., 2012; Doble et al., 2014). From flood inundation simulation with one-dimensional finite difference solutions of the St. Venant equations to two-dimensional finite element and finite difference models, the need for data on river morphology increases from field survey measurements to continuous digital elevation models. Using a low-resolution DEM, details of flow channel features and connectivity gradually  appear. Thus, river characteristics are not always represented well in coarse-resolution grids used in large-scale river routing models (Yamazaki et al., 2011). Although a high-resolution DEM can mitigate this issue, there is an associated increase in computational cost and it is not always available.

15 One way to deal with this problem is to construct a simpler model structure (Bates and De Roo, 2000). Another way is to parameterize sub-grid-scale topography of river channels and floodplains in modelling (Neal et al., 2012; Yamazaki et al., 2011). For example, Coe et al. (2008) considered sub-grid-scale floodplain morphology (i.e. fractional flooding of grid cells), which resulted in significant improvement in the simulations of seasonal and inter-annual flooding.

20 The lack of detailed data on river characteristics often means that river width is either ignored or left as a parameter for calibration, which may increase model uncertainty and decrease accuracy (Andreadis et al., 2013). River width may be set to a constant value without consideration of spatial and temporal variations (Biancamaria et al., 2009). Alternatively, river width may be estimated by empirical functions of drainage area (Coe et al., 2008; Paiva et al., 2013) or river discharge (Decharme et al., 2008; Getirana et al., 2012; Getirana et al., 2013; Andreadis et al., 2013). However, river width estimates

25 from empirical functions cannot provide accurate representations of river reach morphology, as relationships between river width and discharge or drainage area are known to vary in different geomorphological and climate conditions (Yamazaki et al., 2014). If river width is overestimated in hydrological modelling, it may result in both overestimation of river channel storage and underestimation of water storage on the floodplain, and vice versa (O'Loughlin et al., 2013). This will in turn cause errors in the timing and location of flood wave and floodplain inundation predictions.

30

The development of more accurate and explicit river width dataset has been approached in several ways. Pavelsky and Smith (2008) developed a software tool, RivWidth, to automatically extract river width along a river course, combining one channel mask distinguishing water pixels from non-water pixels and another river mask describing areas within river boundary or outside it. Miller et al. (2014) and Allen and Pavelsky (2015, 2018) successfully applied this pioneering



approach to map river width at mean discharge for the Mississippi River Basin, North American rivers, and the whole world, respectively. However, laborious manual inspection and corrections are needed in pre-processing of the water masks, which prohibit its automated application over large scales. For example, undetected channels in water masks have to be drawn manually in order to make the river network fully connected (Neal et al., 2012). To address this issue, Yamazaki et al. (2014) applied an automated algorithm to produce a global river width database for large rivers, GWD-LR, using flow direction maps and water masks. Isikdogan et al. (2017) also developed an automated analysis and mapping engine, RivMap, which is able to delineate river and estimate river width, and used it to generate a river width dataset for North America. However, none of these regional and global datasets consider temporal variability of river width or river width beyond overbank flow conditions.

Our aim was to develop a method for estimating temporal and spatial river width dynamics and use these to find summary parameters to represent river morphology characteristics that could support a classification of river type over the Australian continent. River width dynamics at different recurrence frequencies were estimated from 27-year time series of 25-m resolution surface water extent maps from Landsat remote sensing (Mueller et al., 2016), and a detailed Geographic Information System (GIS) database containing all 1,410,404 river segments and 1,474,271 sub-catchments mapped across Australia (Bureau of Meteorology, 2012a). The width estimates were compared with the global river width dataset (Allen and Pavelsky, 2018) at average flow conditions in 218 river regions of Australia. We analysed the relationships between river width and discharge, drainage area, and gradient, and calculated the coefficient and exponent of the now-classic hydraulic geometry equation for Australia. The river morphology parameters were intended to provide a description of temporal river width dynamics, relating to dominant flow regime (permanent, frequent, intermittent, or ephemeral). We demonstrate the usefulness of our dataset by showing the longitudinal profile of hydromorphological attributes for the main river channel of the Murray River and the complex river systems in one classical Australia's dry and low relief environment.

## 2. Data and method

### 2.1 Data

#### 2.1.1 River and sub-catchment segments

The Australian Hydrological Geospatial Fabric (Geofabric) is a digital database of spatial surface and groundwater features based on a GIS platform that relates important hydrologic features such as catchments, rivers, lakes and aquifers (Bureau of Meteorology, 2012a). The Geofabric Surface Network provides a consistent hydrological surface stream network, which was derived using the 9-second ANUDEM raster streams product (Bureau of Meteorology, 2012b). The surface network has 6 features, namely network stream, upstream network connectivity, downstream network connectivity, network node, water body, and catchment area. Any information associated to the surface network can be easily connected to features in other



Geofabric products, including surface cartography, surface catchment, groundwater cartography, and hydrological reporting catchments and regions, for further applications. The network stream is divided into major rivers and minor rivers, and major rivers generally represent the main watercourses across Australia (Figure 1a and b). These rivers are further classified as flow segments (natural rivers), water area segments (rivers passing through a water body), and artificial segments (to keep the stream network connected). The catchment refers to sub-catchment corresponding to each river segment. The network stream and catchment features are the main data we used to extract information from surface water extent observations (Figure 1b).

### 2.1.2 Surface water extent observations

Water Observations from Space (WOfS) is a publicly-accessible 25-m resolution gridded dataset providing surface water persistence and recurrence information for the Australian continent (Mueller et al., 2016). This historical flood information product was developed using a decision tree method on a combination of normalized difference indices and corrected spectral band values from approximately 184,500 Landsat images (Mueller et al., 2016). The Landsat images used to produce WOfS were the Australian archives of Landsat-5 and Landsat-7 data, which cover 27 years from 1987 to 2014. Here we used the water summary product from WOfS, which provides the recurrence frequency of surface water occurring as a percentage of the number of times the surface was clearly observed for each grid cell. For example, a frequency of 5% means surface water extent was detected on average once in 20 clear-sky Landsat acquisition for that given pixel (Figure 1c). The WOfS product reflects inundation extent for rivers at both in-channel and overflow levels, but cannot relate directly inundated area to its associated river regime (Figure 1a and c). However, this can be achieved by the network stream and catchment features from Geofabric (Figure 1d).

## 2.2 Method

### 2.2.1 River widths at different recurrence frequencies

We used Geofabric sub-catchment boundaries to divide the WOfS water summary map into 1,474,271 segments (Figure 1d). Of these, there is a total of 1,379,224 sub-catchments that have river segments. We calculated inundation extent at different recurrence frequencies (Table 1) in each of these sub-catchment. This step required considerable computing, and we used high-performance computer. Next, we estimated corresponding equivalent river widths for each sub-catchment by dividing inundation extent at different recurrence frequencies by the geodesic length of the river segment calculated from the Geofabric using Vincenty's Inverse Method (Vincenty, 1975). In addition, DEM information was extracted from the 1 Second DEM, an elevation data product developed by Geoscience Australia using the Shuttle Radar Topography Mission (SRTM) data (Geoscience Australia, 2011), for the upstream and downstream end points of each river segment. River gradient was calculated by dividing the elevation difference between upstream and downstream points by river length for

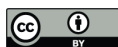

each river segment. Finally, we obtained estimated spatial and temporal river widths, and river gradients for 1,379,224 river reaches across the Australian continent.

We compared our spatial and temporal river width data to the Global River Widths from Landsat (GRWL) dataset (Allen and Pavelsky, 2018) over Australia. Allen and Pavelsky (2018) produced estimates of global river width at approximately mean discharge, which is related to the month that rivers are most likely to be at mean discharge value from the nearest gauging station for each Landsat tile. However, it is less likely to represent the average conditions of ungauged river reaches as the distance from the nearest gauging station increases, and most river reaches around the world are ungauged. Additionally, it does not correspond with any particular recurrence frequency. Thus, to facilitate comparison between the two sets of results, we calculated Spearman correlations between our river width estimates at frequency of 50% and GRWL river widths and did this separately for the 218 river regions in Australia. High correlations mean our river width data reflect the same relative width variations along the river channel from upstream to downstream for a river region as the global river width dataset. In addition, upstream cumulative mean runoff of each river segment was calculated based on the Australian Water Resources Assessment (AWRA) landscape hydrology model (Van Dijk, 2010), which is used by the Australian Bureau of Meteorology to operationally estimate daily water balance component across Australia at a spatial resolution of  $0.05^\circ \times 0.05^\circ$  (Frost et al., 2016). We analysed the relationship between river width and upstream cumulative runoff or upstream drainage area, and also the correspondence between river width and gradient for Australia. Furthermore, we established classical functional power-law relationships that relate river width to upstream cumulative runoff or upstream drainage area as follows:

$$w = aQ^b \quad (1)$$

$$w = cA^d \quad (2)$$

where  $w$  is river width (m),  $Q$  is cumulative upstream runoff ( $\text{m}^3/\text{s}$ ),  $A$  is upstream drainage area ( $\text{km}^2$ ). Coefficients  $a$  and  $c$  and exponents  $b$  and  $d$  were fitted and compared to the results from published studies.

### 2.2.2 River morphology characteristics

The pixels in WOfS do not have equal numbers of clear observations mainly due to overlapping Landsat scenes and cloud and shadow frequency. As a result, the surface water extent map shows oblique strips across the Australian continent for very low recurrence frequencies. To avoid these artefacts, we generated river width maps by varying recurrence frequency between low to high until the majority of artefacts disappeared. We regarded the resulting lowest frequency river width map without artefacts as representing the maximum river width. Next, we standardized river widths at different recurrence frequencies by dividing them by maximum river width, producing a width fraction representing the ratio of river width at different recurrence frequencies to maximum width.

$$F_i = W_i / W_{\max} \quad (3)$$



where  $F_i$  is width fraction at  $i$ -th frequency (Table 1),  $W_i$  is river width (m) at  $i$ -th frequency, and  $W_{\max}$  is maximum river width (m). The relationship between width fraction and its corresponding frequency was generally well-described by a Weibull distribution, and therefore we used the Weibull inverse survival function (Croarkin et al., 2006) to fit the relationship for each river reach as follows:

$$F_i = (-\ln(R))^{1/\gamma} \quad (4)$$

where  $R$  is width fraction corresponding frequency  $i$ ,  $\gamma$  is a parameter. We used differential evolution (Storn and Price, 1997) to estimate the parameter for each river reach. The parameter  $\gamma$  reflects different shapes for relationships between width fraction and frequency, and was used to characterize river morphology for 1,379,224 river reaches across the continent. The larger  $\gamma$ , the more time the river width is close to minimum width, and the closer to 0, the more time the river width is close to maximum width. The characteristic curves for rivers of invariable width show a horizontal line, which leads to infinitely large estimates of  $\gamma$ . We empirically limited  $\gamma$  between 0 and 5, which was suitable for the large majority of rivers in Australia.

After  $\gamma$  was estimated for each river reach, we classified river reaches into 10 categories according to their corresponding  $\gamma$  values (Table 2). We selected median values of width fraction at certain recurrence frequencies (Table 1), respectively, for each category, and used equation (4) to fit the relationship between width fraction and its corresponding frequency for estimating  $\gamma$  value. Lastly, we used equation (4) and estimated  $\gamma$  values to predict width fraction for each category, and compared them with observed width fraction. This process was intended to test whether the parameter  $\gamma$  represented recurrence-width relationship for different river reaches well.

## 3. Results

### 3.1 Reach width-frequency distribution

Temporal observation frequency artefacts largely disappeared at 0.5% frequency. Hence, we selected river width at this frequency as the maximum river width (Figure 2a). We chose inundation at 80% frequency to represent minimum river extent (Figure 2b). Large differences existed between maximum and minimum width (Figure 2). Although there are many rivers reaches across Australia, most of them are ephemeral. Most of the (semi-) permanent rivers are located along the northern and eastern coast. There are many ephemeral river reaches with very broad maximum widths in the tributary catchments of the Murray-Darling Basin and in the interior Lake Eyre catchment, as well as along the Gulf of Carpentaria. River reaches flowing through a large water body, e.g. reservoir or lake, also have very large calculated widths. We did not exclude these river reaches, because they keep the river network connected and because such reaches are identified in the Geofabric mapping and hence can be selected as required. Some regions showed no meaningful river network (Figure 2a). Most of these regions are arid catchments with a sandy alluvial substrate. Presumably, this leads to an infiltration capability



that is sufficient to prevent significant surface runoff accumulation, whereas several of the catchments also contain recent dune systems that have interrupted a pre-existing drainage network (Figure 2a) divided river reaches into three categories based on their maximum width: small (<25 m), medium (25-250 m), and large (>250 m). It is noted that small rivers will not be narrower than 25 m along their entire width; a non-zero width is calculated because some of the 25m pixels along the reach were mapped as inundated at 0.5% maximum extent. Therefore, we only list summary statistics here for medium and large rivers (Table 2). The total length of reaches in different maximum and minimum width classes is listed in Table 3, showing the same distribution pattern when including respectively excluding segments flowing through water bodies. The total length decreases as maximum and minimum river width increases from 25 m up to more than 10 km. The total reach length in different width ranges and at different recurrence frequencies (Figure 3) decreases by a factor 21 as frequency increases from 0.5% to 80%. The majority of river reaches are 25-250 m broad irrespective of frequency range (Figure 3).

We compared river width at different recurrence frequencies with river gradient for all river reaches, as well as with upstream drainage area and cumulative runoff. For comparison with drainage area and runoff, we included only major rivers because the contribution of upstream flow to minor rivers can be uncertain, for example for anabranches and distributaries. Upstream drainage area and total runoff best predicted maximum reach width, with Pearson correlations of 0.52 and 0.43, respectively, while gradient showed the expected negative relationship with maximum river width (Figure 4). Reflecting the most common way of river width estimation, we fitted equation (1). We excluded river widths with small upstream cumulative runoff ( $<10^{4.5} \text{ m}^3$  or  $0.37 \text{ m}^3/\text{s}$ ) due to the influence of their sparse distribution on the overall relationship. This resulted in a relationship with a coefficient  $a=13.17$  and exponent  $b=0.49$ . We found that reach gradient affects  $a$  significantly, with decreasing width as gradient increases, but it did not appear to affect  $b$  except perhaps for the highest gradient class ( $>0.01$ , Table 4).

River width at 50% frequency (i.e., median width) was compared with river widths considered representative of ‘average’ flows contained in the GRWL. Among the 218 Australian river regions, only 111 regions had any inundated river channel under ‘average’ conditions in the GRWL river width dataset, whereas all 218 river regions contained detected rivers in our analysis results. The Spearman’s rank correlation between median river width and river widths from the global dataset exceeded 0.6 for 68% (75) of 111 river regions and above 0.4 for 86% (95) of them, suggesting that the two datasets show reasonably similar relative width variations.

### 3.2 River hydromorphology classification

The parameter  $\gamma$  represents the degree to which rivers tend towards permanent or ephemeral flow regime. Most rivers, particularly the larger rivers along the coast flow through estuaries or other (quasi) permanent water bodies, and hence are





classified as permanent or frequent ( $\gamma > 0.8$ , Figure 5). Calculating the combined length of medium and large river reaches in different  $\gamma$  ranges (Figure 6) shows that the majority fall within  $\gamma = 0.1$ – $0.6$ , indicating that the dominant flow regime for Australian rivers is ephemeral or intermittent.

- 5 The average frequency-width data and fitted curves for different  $\gamma$  classes are shown in Figure 7. The standard differences between observed and fitted width fractions range from 0.0075 to 0.0725 (Table 5). Relative width was overestimated for frequencies between 20–50% for  $\gamma$  0.6–1.5, and for frequencies between 5–20% for  $\gamma$  0.2–0.8. Despite these biases, the curves generally capture the relationship between width fraction and frequency well.

### 3.3 Qualitative evaluation

- 10 A longitudinal profile of river width, gradient and flow regime parameter  $\gamma$  for the main channel of the Murray River (Figure 8) illustrates several features in the data. Strong width variations between 0.5% and 80% frequency can occur, indicating that the river channel contains water for most of the time ( $>50\%$  frequency) but contained within a relatively narrow channel. River width increases significantly between 5–8% and 1–2% frequency, which coincides with the threshold for overbank flows. The greatest widths are in reaches flowing through large water bodies, such as Lake Hume (C; storage reservoir),
- 15 Yarrawonga Weir (D; impoundment), Lake Alexandrina (K; the terminal lake system), and other wetlands (F, H and I). Where river flows are confined, widths do not change much (e.g. G; Mildura). Where flow splits into multiple channels before converging again, minimum channel width reduces (e.g., E and F) whereas maximum width increases corresponding to a broader floodplain. Between A and B, river reaches have water for 5–8% of the time in our data, but not in the GRWL dataset (Allen and Pavelsky, 2018) (Fig. 8b). The GRWL widths under ‘average’ conditions are contained within the
- 20 distribution in our data, but for rather widely varying frequencies. A narrowing relative difference between the 0.5% and 80% frequency widths corresponds with higher  $\gamma$  values, and vice versa (Fig. 9b). This shows that the river morphology parameter  $\gamma$  can capture river flow regime. In line with Figure 4c, river width increases as gradient decreases from upstream to downstream overall (Figure 8b and c).
- 25 Figure 9 illustrates some of the data characteristics and challenges in complex river systems common in Australia’s dry and low relief environments. During floods, all river channels are inundated, and rivers are broad (Figure 9a). Only the main Darling River channel contains water frequently (Figure 9b) but is still very narrow during low flows (Figure 9c). All reaches have an ephemeral or intermittent flow regime (Figure 9f) with  $\gamma < 0.8$ , with the southern Talyawalka Creek showing a more ephemeral regime than the Darling River.

## 30 4. Discussion



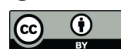

The Geofabric contains nearly 1.4 million river segments across the Australian continent, and provides valuable information on river path, length and contributing sub-catchment area. We were able to assign summary metrics derived from spatial and temporal surface water extent information contained in the satellite-derived WOfS to the river reaches and calculate river widths at different recurrence frequencies. The Geofabric Surface Network had a total length of 3.3 million km. Compared to  
5 HydroSHEDS (Lehner et al., 2008), probably the most commonly used global hydrological dataset, the Geofabric delineates a finer-resolution stream network and describes the natural variation in drainage density and complex distributary and anabranching drainage patterns better (Stein et al., 2014). Nonetheless, the 9s DEM resolution is still insufficient to delineate all floodplains and river flow paths accurately. A new version of the Geofabric at 1s resolution has been produced for part of  
10 Australia, and once available nationally could be used to improve derived river characteristics. Similarly, the WOfS data continues to receive updates.

Errors in the calculated river characteristics also derive from uncertainties in WOfS inundation mapping. Narrow rivers, small water bodies, and wetlands with vegetation cover may be missed in mapping, and conversely topographical shadows in steep terrain or in high-rise cityscapes can be misclassified as water. Noise in very clear water can also result in  
15 misclassification (Mueller et al., 2016). There are also data gaps in WOfS, and occasional linear artefacts caused by the Scan-Line-Corrector-Off (SLC-Off) problem in Landsat-7 (Mueller et al., 2016). Nevertheless, the overall accuracy of the water classifier used in WOfS was 97%, which gives confidence in our derived metrics.

Our dataset has some advantages over existing datasets such as GRWL. Firstly, it provides spatial and temporal information  
20 on river dynamics at both in-channel and overbank flows. Secondly, if one river reach has multiple channels, we calculated river width for each channel rather than considering them a single channel. Thirdly, our data provides more detailed information due to the finer river network contained in the Geofabric. Finally, our product can be readily related to any hydrological feature in the Geofabric for further application.

25 The relationship between river width and contributing catchment area, cumulative runoff and reach gradient can be compared to literature values. Empirically relating drainage area to river width (i.e. Eq (2)), Coe et al. (2008) obtained a coefficient  $c=0.42$  and exponent  $d=0.59$ , whereas Paiva et al. (2013) found  $c$  of 0.35–3.75 and  $d$  of 0.36–0.63 for different river basins (Table 6). We found intermediate values of  $c=0.91$  and  $d=0.43$ . A more common way to estimate river width is from mean annual discharge, Eq (1). Decharme et al. (2008), Getirana et al. (2012, 2013) and Andreadis et al. (2013) all  
30 assumed an exponent  $b=0.5$ , as suggested by Leopold and Maddock (1953) and Leopold et al. (1964) (Table 6). We found very similar values for the exponent. By contrast, the value of the coefficient  $a$  varies widely between studies (Table 6). Getirana et al. (2012, 2013) used a high value of  $a=18$  for the Amazon basin whereas Andreadis et al. (2013) used  $a=7.2$  for their global application. We estimated  $a=13.1$  for all Australian reaches combined, but also found evidence that  $a$  correlates to the river reach gradient (Table 4), which may help explain differences between previous studies.



Although the empirical scaling functions discussed here can be used to estimate river width based on drainage area or modelled runoff with modest skill, there are also clear limitations. Firstly, they are not able to estimate river widths at different recurrence frequencies. Secondly, individual river reaches with the same upstream drainage area or cumulative runoff can have widely different river widths. For example, as mentioned, we found evidence that a reach with a more gentle gradient can be expected to be wider in comparison (Table 4), consistent with the Manning equation. Thirdly, scaling equations cannot be applied to multi-channelled rivers. Therefore, rather than empirical functions, the river width-frequency relationships derived here should help to improve the description of river morphology in hydrological modelling.

Some uncertainties are inherent to the approach followed here and would benefit from further research. Firstly, we calculated river width based on inundation extent within the entire designated sub-catchment boundary for each river reach. Although this excluded most unrelated water bodies and other river channels, the water mapping may still include unconnected water bodies, such as off-channel storages. This would cause overestimation of river width. Secondly, although the data provide detailed information on the width of individual channels in anabranching river systems, the multiple channels will often merge into a single channel during overbank flow events. Our data do not reflect this merging and separating of channels at different flow levels and it is challenging to find a way to conceptually address this in the Geofabric framework.

Looking beyond Australia, the method proposed here is applicable in any region of the world where high-resolution inundation time series mapping is feasible, and where good quality DEM-derived river path, length, and sub-catchment area data are available. Thus, it would seem feasible to use a similar methodology as that employed here to develop a global river hydromorphology dataset using global inundation time series Landsat mapping (Donchyts et al., 2016; Pekel et al., 2016), for example.

## 5. Data availability

The river hydromorphology data is available at <http://dx.doi.org/10.25914/5c637a7449353> (Hou et al. 2019) and also can be downloaded directly from <http://wald.anu.edu.au/data/>. The data is in ASCII format, which can be directly joined to the Geofabric products, including surface cartography, surface catchments, surface network, groundwater cartography, and hydrological reporting catchments and regions. The Geofabric Surface Network can be accessed from <http://www.bom.gov.au/water/geofabric/>. The instruction to use this data can be found in 'readme' file. The data may be converted to any format (e.g., shapefile or raster) and combined with other Geofabric data, such as river name, river length, feature type (nature, artificial, or water area flow segment), hierarchy (major or minor rivers), flow direction, and upstream drainage area and river length.



## 6. Conclusion

We developed a river hydromorphology dataset for Australia by combining surface water recurrence information from the WOfS Landsat-derived dynamic water mapping product and GIS-based hydrological features from the Australian Geofabric. Our data provide river widths at different recurrence frequencies for  $5.84 \times 10^8$  m river reaches across the Australian continent. A river morphology parameter  $\gamma$  is proposed to describe the shape of the width-frequency curve and can be interpreted as the degree to which rivers tend towards permanent, frequent, intermittent or ephemeral. The majority of medium and large rivers in Australia have widths between 25–250 m and show an ephemeral or intermittent flow regime. The data show correlation between maximum river width and cumulative upstream runoff, upstream drainage area and gradient, in line with previously published results. The dataset developed here may be useful in providing fundamental information for understanding hydrological, biogeochemical and ecological processes in floodplain-river systems; describing river width features in hydrological modelling; estimating river depth and discharge; assessing river conveyance capacity; identifying flooding-prone areas, and determining potential locations for satellite-based river gauging.

## Acknowledgements:

We thank Geoscience Australia and Australian Bureau of Meteorology for developing Australian Hydrological Geospatial Fabric (Geofabric) and Water Observations from Space (WOfS). The first author thanks the ANU-CSC (the Australian National University and the China Scholarship Council) Scholarship for supporting his PhD study at the Australian National University. Calculations were performed on the high-performance computing system, Raijin, from the National Computational Infrastructure (NCI), which is supported by the Australian Government. This paper is published with the permission of the CEO, Geoscience Australia.

## 20 Reference

- Allen, G. H., and Pavelsky, T. M.: Patterns of river width and surface area revealed by the satellite-derived North American river width data set, *Geophysical Research Letters*, 42, 395–402, doi:10.1002/2014GL062764, 2015.
- Allen, G. H., and Pavelsky, T. M.: Global extent of rivers and streams, *Science*, 361, 585–588, doi:10.1126/science.aat0636, 2018.
- 25 Andreadis, K. M., Schumann, G. J. P., and Pavelsky, T.: A simple global river bankfull width and depth database, *Water Resources Research*, 49, 7164–7168, doi:10.1002/wrcr.20440, 2013.
- Arora, V. K., and Boer, G. J.: A variable velocity flow routing algorithm for GCMs, *Journal of Geophysical Research: Atmospheres*, 104, 30965–30979, doi:10.1029/1999JD900905, 1999.
- Bates, P. D., and De Roo, A. P. J.: A simple raster-based model for flood inundation simulation, *Journal of Hydrology*, 236, 54–77, doi:10.1016/S0022-1694(00)00278-X, 2000.
- 30

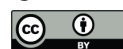

- Biancamaria, S., Bates, P. D., Boone, A., and Mognard, N. M.: Large-scale coupled hydrologic and hydraulic modelling of the Ob river in Siberia, *Journal of Hydrology*, 379, 136-150, doi:10.1016/j.jhydrol.2009.09.054, 2009.
- Bureau of Meteorology: Australian Hydrological Geospatial Fabric (Geofabric) Product Guide, 2012a.
- Bureau of Meteorology: Australian Hydrological Geospatial Fabric (Geofabric) Data Product Specification, 2012b.
- 5 Coe, M. T., Costa, M. H., and Howard, E. A.: Simulating the surface waters of the Amazon River basin: impacts of new river geomorphic and flow parameterizations, *Hydrological Processes*, 22, 2542-2553, doi:10.1002/hyp.6850, 2008.
- NIST/SEMATECH e-handbook of statistical methods, <http://www.itl.nist.gov/div898/handbook>, 2018.
- Dadson, S. J., Ashpole, I., Harris, P., Davies, H. N., Clark, D. B., Blyth, E., and Taylor, C. M.: Wetland inundation dynamics in a model of land surface climate: Evaluation in the Niger inland delta region, *Journal of Geophysical Research:*
- 10 *Atmospheres*, 115, doi:10.1029/2010JD014474, 2010.
- Decharme, B., Douville, H., Prigent, C., Papa, F., and Aires, F.: A new river flooding scheme for global climate applications: Off-line evaluation over South America, *Journal of Geophysical Research: Atmospheres*, 113, doi:10.1029/2007JD009376, 2008.
- Doble, R., Crosbie, R., Peeters, L., Joehnk, K., and Ticehurst, C.: Modelling overbank flood recharge at a continental scale,
- 15 *Hydrology and Earth System Sciences*, 18, 1273-1288, doi:10.5194/hess-18-1273-2014, 2014.
- Donchyts, G., Baart, F., Winsemius, H., Gorelick, N., Kwadijk, J., and Van De Giesen, N.: Earth's surface water change over the past 30 years, *Nature Climate Change*, 6, 810-813, doi:10.1038/nclimate3111, 2016.
- Frost, A. J., Ramchurn, A., and Smith, A.: The Bureau's Operational AWRA Landscape (AWRA-L) Model, Bureau of Meteorology, Technical Report, 2016.
- 20 Getirana, A. C. V., Boone, A., Yamazaki, D., Decharme, B., Papa, F., and Mognard, N.: The hydrological modeling and analysis platform (HyMAP): Evaluation in the Amazon basin, *Journal of Hydrometeorology*, 13, 1641-1665, doi:10.1175/JHM-D-12-021.1, 2012.
- Getirana, A. C. V., Boone, A., Yamazaki, D., and Mognard, N.: Automatic parameterization of a flow routing scheme driven by radar altimetry data: Evaluation in the Amazon basin, *Water Resources Research*, 49, 614-629, doi:10.1002/wrcr.20077,
- 25 2013.
- Hou, J., Van Dijk, A. I. J. M., Renzullo, L. J., Vertessy, R. A., Mueller, N.: Hydromorphological attributes for all Australian river reaches, <http://dx.doi.org/10.25914/5c637a7449353>, 2019.
- Isikdogan, F., Bovik, A., and Passalacqua, P.: RivaMap: An automated river analysis and mapping engine, *Remote Sensing of Environment*, 202, 88-97, doi:10.1016/j.rse.2017.03.044, 2017.
- 30 Kleinmans, M. G., and Van Den Berg, J. H.: River channel and bar patterns explained and predicted by an empirical and a physics-based method, *Earth Surface Processes and Landforms*, 36, 721-738, doi:10.1002/esp.2090, 2011.
- Lehner, B., Verdin, K., and Jarvis, A.: New global hydrography derived from spaceborne elevation data, *Eos, Transactions American Geophysical Union*, 89, 93-94, doi:10.1029/2008EO100001, 2008.



- Leopold, L. B., and Maddock, T.: The hydraulic geometry of stream channels and some physiographic implications, U.S. Government Printing Office, Washington, D.C., 1953.
- Leopold, L. B., Wolman, M. G., and Miller, J. P.: Fluvial processes in geomorphology, W.H. Freeman and Company, San Francisco, 1964.
- 5 Miller, Z. F., Pavelsky, T. M., and Allen, G. H.: Quantifying river form variations in the Mississippi Basin using remotely sensed imagery, *Hydrology and Earth System Sciences*, 18, 4883-4895, doi:10.5194/hess-18-4883-2014, 2014.
- Mueller, N., Lewis, A., Roberts, D., Ring, S., Melrose, R., Sixsmith, J., Lymburner, L., McIntyre, A., Tan, P., and Curnow, S.: Water observations from space: Mapping surface water from 25 years of Landsat imagery across Australia, *Remote Sensing of Environment*, 174, 341-352, doi:10.1016/j.rse.2015.11.003, 2016.
- 10 Nanson, G. C., and Knighton, A. D.: Anabranching rivers: their cause, character and classification, *Earth Surface Processes and Landforms*, 21, 217-239, doi:10.1002/(SICI)1096-9837(199603)21:3<217::AID-ESP611>3.0.CO;2-U, 1996.
- Neal, J., Schumann, G., and Bates, P.: A subgrid channel model for simulating river hydraulics and floodplain inundation over large and data sparse areas, *Water Resources Research*, 48, doi:10.1029/2012WR012514, 2012.
- O'Loughlin, F., Trigg, M. A., Schumann, G. J. P., and Bates, P. D.: Hydraulic characterization of the middle reach of the Congo River, *Water Resources Research*, 49, 5059-5070, doi:10.1002/wrcr.20398, 2013.
- 15 Paiva, R. C. D., Buarque, D. C., Collischonn, W., Bonnet, M. P., Frappart, F., Calmant, S., and Mendes, C. A. B.: Large-scale hydrologic and hydrodynamic modeling of the Amazon River basin, *Water Resources Research*, 49, 1226-1243, doi:10.1002/wrcr.20067, 2013.
- Pavelsky, T. M., and Smith, L. C.: RivWidth: A software tool for the calculation of river widths from remotely sensed imagery, *IEEE Geoscience and Remote Sensing Letters*, 5, 70-73, doi:10.1109/LGRS.2007.908305, 2008.
- 20 Pedinotti, V., Boone, A., Decharme, B., Crétau, J. F., Mognard, N., Panthou, G., Papa, F., and Tanimoun, B. A.: Evaluation of the ISBA-TRIP continental hydrologic system over the Niger basin using in situ and satellite derived datasets, *Hydrology and Earth System Sciences*, 16, 1745-1773, doi:10.5194/hess-16-1745-2012, 2012, 2012.
- Pekel, J.-F., Cottam, A., Gorelick, N., and Belward, A. S.: High-resolution mapping of global surface water and its long-term changes, *Nature*, 540, 418-422, doi:10.1038/nature20584, 2016.
- 25 Rosgen, D. L.: A classification of natural rivers, *Catena*, 22, 169-199, doi:10.1016/0341-8162(94)90001-9, 1994.
- Stein, J. L., Hutchinson, M. F., and Stein, J. A.: A new stream and nested catchment framework for Australia, *Hydrology and Earth System Sciences*, 18, 1917-1933, doi:10.5194/hess-18-1917-2014, 2014.
- Storn, R., and Price, K.: Differential evolution—a simple and efficient heuristic for global optimization over continuous spaces, *Journal of Global Optimization*, 11, 341-359, doi:10.1023/A:1008202821328, 1997.
- 30 Van Dijk, A. I. J. M.: Australian Water Resources Assessment System. Technical Report 3. Landscape Model (version 0.5) Technical Description. CSIRO: Water for a Healthy Country. National Research Flagship., 2010.
- Vincenty, T.: Geodetic inverse solution between antipodal points, Richard Rapp Geodetic Science Ohio State University, 1975.

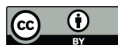

Yamazaki, D., Kanae, S., Kim, H., and Oki, T.: A physically based description of floodplain inundation dynamics in a global river routing model, *Water Resources Research*, 47, doi:10.1029/2010WR009726, 2011.

Yamazaki, D., O'Loughlin, F., Trigg, M. A., Miller, Z. F., Pavelsky, T. M., and Bates, P. D.: Development of the global width database for large rivers, *Water Resources Research*, 50, 3467-3480, doi:10.1002/2013WR014664, 2014.

5

10

15

20

25

30

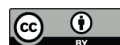**Table 1** The categories of recurrence frequency for which calculations were performed.

| Frequency | Description                                 | Frequency | Description                                 |
|-----------|---------------------------------------------|-----------|---------------------------------------------|
| 0%        | Water not detected                          | 5%        | Water detected 5 times in 100 observations  |
| 0.1%      | Water detected 1 times in 1000 observations | 8%        | Water detected 8 times in 100 observations  |
| 0.2%      | Water detected 2 times in 1000 observations | 10%       | Water detected 10 times in 100 observations |
| 0.3%      | Water detected 3 times in 1000 observations | 20%       | Water detected 20 times in 100 observations |
| 0.4%      | Water detected 4 times in 1000 observations | 50%       | Water detected 50 times in 100 observations |
| 0.5%      | Water detected 5 times in 1000 observations | 80%       | Water detected 80 times in 100 observations |
| 0.8%      | Water detected 8 times in 1000 observations | 90%       | Water detected 90 times in 100 observations |
| 1%        | Water detected 1 times in 100 observations  | 95%       | Water detected 95 times in 100 observations |
| 2%        | Water detected 2 times in 100 observations  | 100%      | Water detected always                       |

5 **Table 2** Ten categories of river reaches based on  $\gamma$  values

| Flow Regime | Ephemeral |          |         | Intermittent |         |         | Frequent |       |       | Permanent |
|-------------|-----------|----------|---------|--------------|---------|---------|----------|-------|-------|-----------|
| $\gamma$    | 0~0.05    | 0.05~0.1 | 0.1~0.2 | 0.2~0.4      | 0.4~0.6 | 0.6~0.8 | 0.8~1    | 1~1.5 | 1.5~3 | 3~5       |

**Table 3** The total lengths in different width ranges of maximum (a) and minimum (b) river widths for Australia (all reaches include river segments and segments flowing through water bodies).

| River Width Range (m) | Length (All Reaches; m) |                       | Length (River Segments; m) |                       |
|-----------------------|-------------------------|-----------------------|----------------------------|-----------------------|
|                       | Maximum Width (R=0.5%)  | Minimum Width (R=80%) | Maximum Width (R=0.5%)     | Minimum Width (R=80%) |
| 25~50                 | $1.32 \times 10^8$      | $8.01 \times 10^6$    | $1.06 \times 10^8$         | $5.89 \times 10^6$    |
| 50~100                | $1.22 \times 10^8$      | $7.19 \times 10^6$    | $9.42 \times 10^7$         | $5.26 \times 10^6$    |
| 100~250               | $1.45 \times 10^8$      | $6.77 \times 10^6$    | $1.07 \times 10^8$         | $3.97 \times 10^6$    |
| 250~500               | $8.64 \times 10^7$      | $2.83 \times 10^6$    | $5.86 \times 10^7$         | $9.88 \times 10^5$    |
| 500~1000              | $5.53 \times 10^7$      | $1.82 \times 10^6$    | $3.12 \times 10^7$         | $3.16 \times 10^5$    |
| 1000~2500             | $3.25 \times 10^7$      | $1.08 \times 10^6$    | $1.30 \times 10^7$         | $1.66 \times 10^5$    |
| 2500~5000             | $7.65 \times 10^6$      | $2.46 \times 10^5$    | $1.70 \times 10^6$         | $1.25 \times 10^4$    |
| 5000~10000            | $2.27 \times 10^6$      | $5.60 \times 10^4$    | $3.78 \times 10^5$         | $9.49 \times 10^2$    |
| >10000                | $7.90 \times 10^5$      | $6.08 \times 10^3$    | $1.13 \times 10^5$         | 0                     |
| Total                 | $5.84 \times 10^8$      | $2.80 \times 10^7$    | $4.12 \times 10^8$         | $1.66 \times 10^7$    |

10 **Table 4** The coefficients a and exponents b of the power scaling relationship predicting maximum river width from upstream cumulative runoff (Eq. 1) calculated for different reach gradient classes.

| Gradient      | All   | 0-0.0001 | 0.0001-0.001 | 0.001-0.01 | >0.01 |
|---------------|-------|----------|--------------|------------|-------|
| Coefficient a | 13.17 | 26.92    | 21.38        | 11.75      | 8.91  |
| Exponent b    | 0.49  | 0.49     | 0.47         | 0.48       | 0.41  |



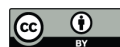**Table 5** Validation of curves fitting for different river morphology categories

| $\gamma$ interval    | 0~0.05 | 0.05~0.1 | 0.1~0.2 | 0.2~0.4 | 0.4~0.6 | 0.6~0.8 | 0.8~1  | 1~1.5  | 1.5~3  | 3~5    |
|----------------------|--------|----------|---------|---------|---------|---------|--------|--------|--------|--------|
| Percentage           | 6.18%  | 11.68%   | 18.64%  | 28.93%  | 13.39%  | 5.82%   | 3.49%  | 5.12%  | 4.35%  | 0.98%  |
| Coefficient $\gamma$ | 0.04   | 0.07     | 0.15    | 0.30    | 0.51    | 0.73    | 0.94   | 1.32   | 2.31   | 4.07   |
| Standard Difference  | 0.0075 | 0.0104   | 0.0202  | 0.0446  | 0.0725  | 0.0489  | 0.0344 | 0.0337 | 0.0407 | 0.0206 |

5

**Table 6** Comparison of coefficients and exponents for equation (1) and (2) between different research

| Research                     | Equation                | a                                | b              | c         | d         | Scale         |
|------------------------------|-------------------------|----------------------------------|----------------|-----------|-----------|---------------|
| Coe et al. (2008)            | $w = cA^d$              | -                                | -              | 0.42      | 0.59      | Amazon        |
| Paiva et al. (2013)          | $w = cA^d$              | -                                | -              | 0.35-3.75 | 0.36-0.63 | Amazon        |
| Decharme et al. (2008)       | $w = \max(25, aQ^b)$    | $a = (10^{-4}Q_{m,mouth} + 6)^*$ | 0.5            | -         | -         | South America |
| Getirana et al. (2012, 2013) | $w = \max(10, aQ^b)$    | 18                               | 0.5            | -         | -         | Amazon        |
| Andreadis et al. (2013)      | $w = aQ^b$              | 7.2                              | $0.5 \pm 0.02$ | -         | -         | Globe         |
| This Study                   | $w = aQ^b$ ; $w = cA^d$ | 13.17                            | 0.49           | 0.91      | 0.43      | Australia     |

\*suggested by Arora and Boer (1999) ( $Q_{m,mouth}$  is the mean annual discharge at the mouth of the river)

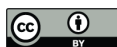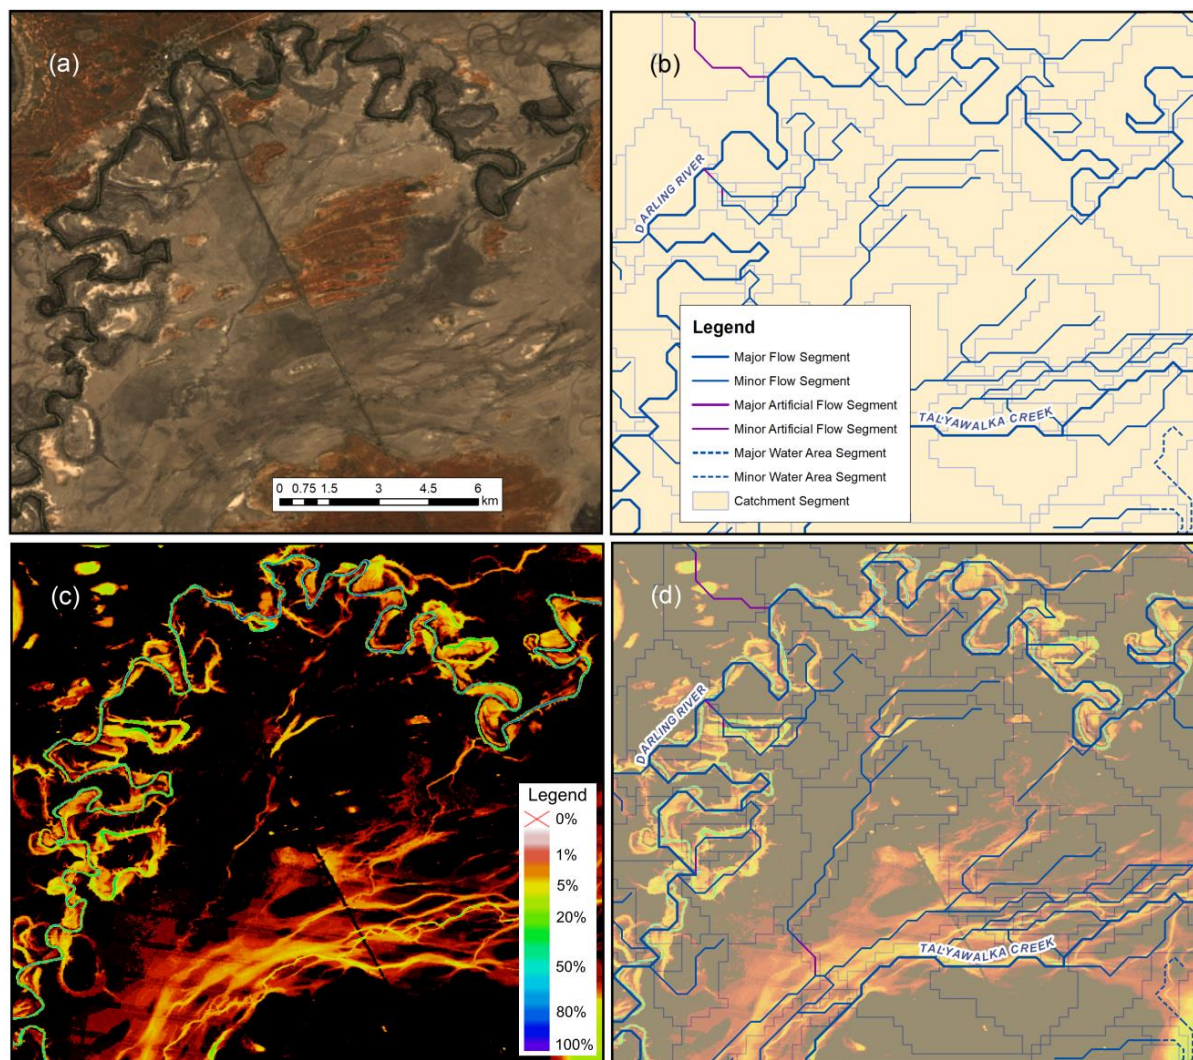

**Figure 1** Illustration of the data used in the investigations: (a) true colour median-value composite of Landsat-8 data for a 15.7 km x 15.3 km area centered on 31.62 S and 143.42 N; (b) river segments and corresponding sub-catchment area from the Geofabric Surface Network; (c) WOfS Water Summary showing the percentage of the number of times the surface water was observed; and (d) overlay of the Geofabric onto WOfS (i.e. b and c).

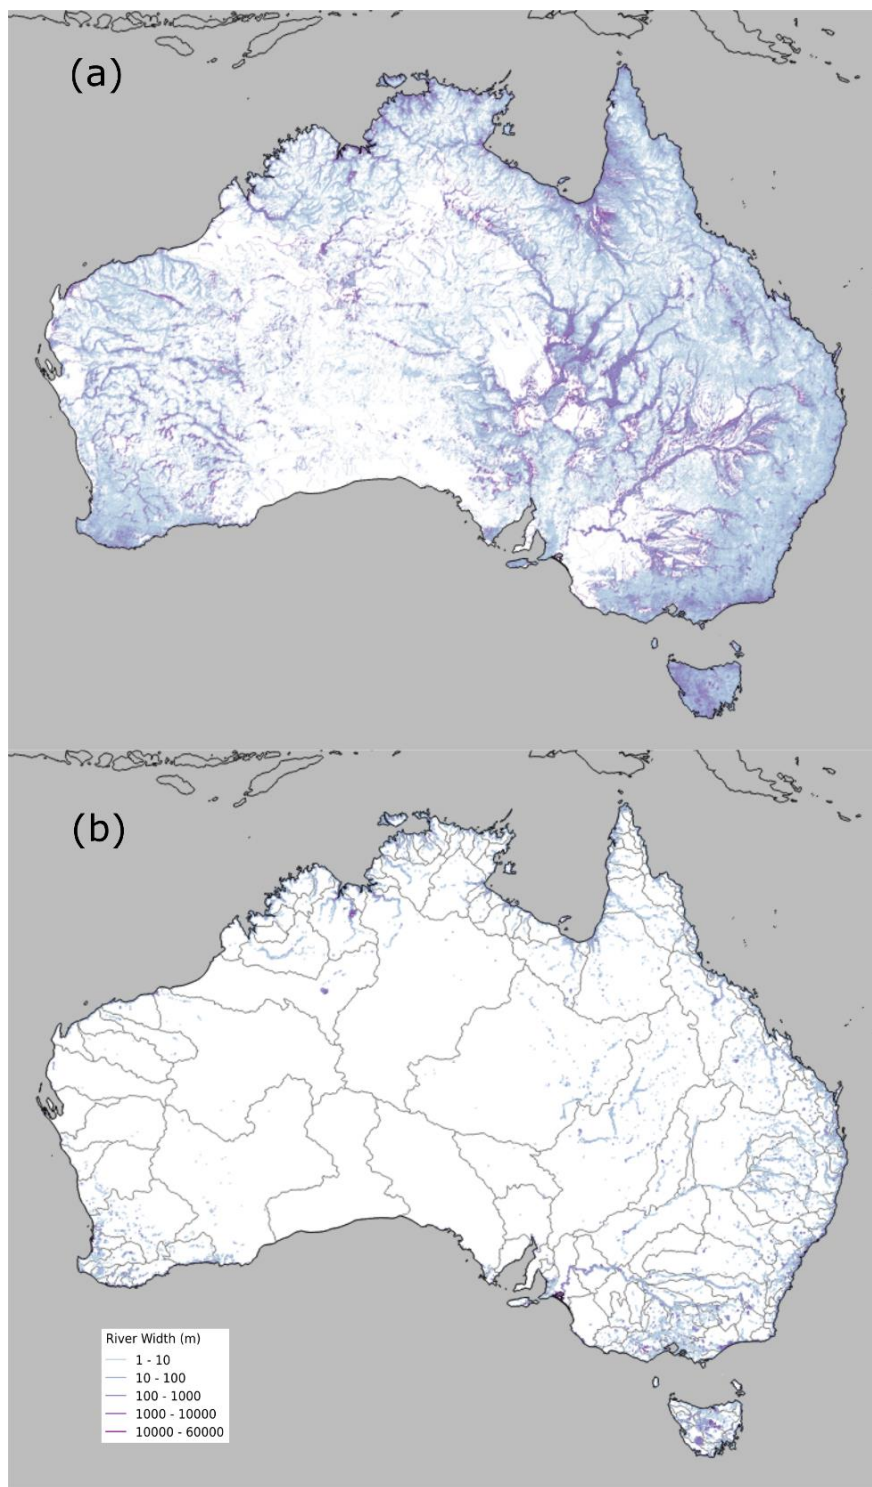

**Figure 2** Maximum (a) and minimum (b) river width across Australia. 218 river regions delineated in grey in subfigure b.

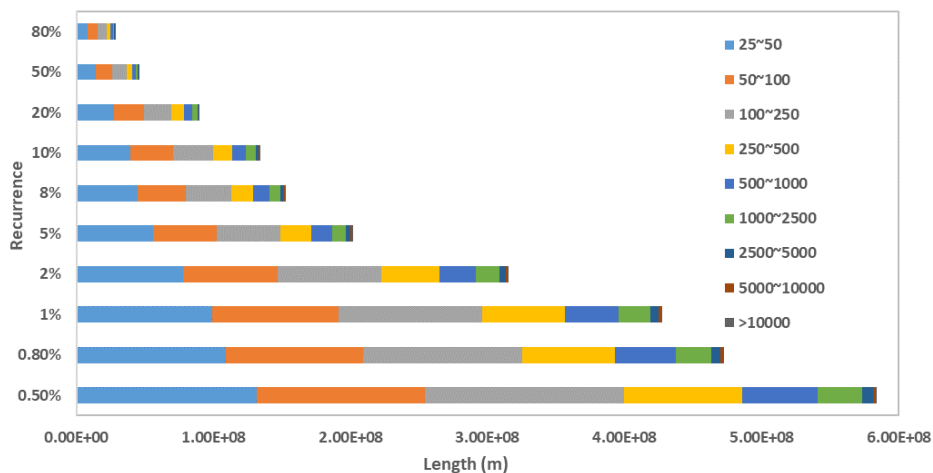

**Figure 3** The total lengths in different width ranges at different recurrence frequencies for Australia.

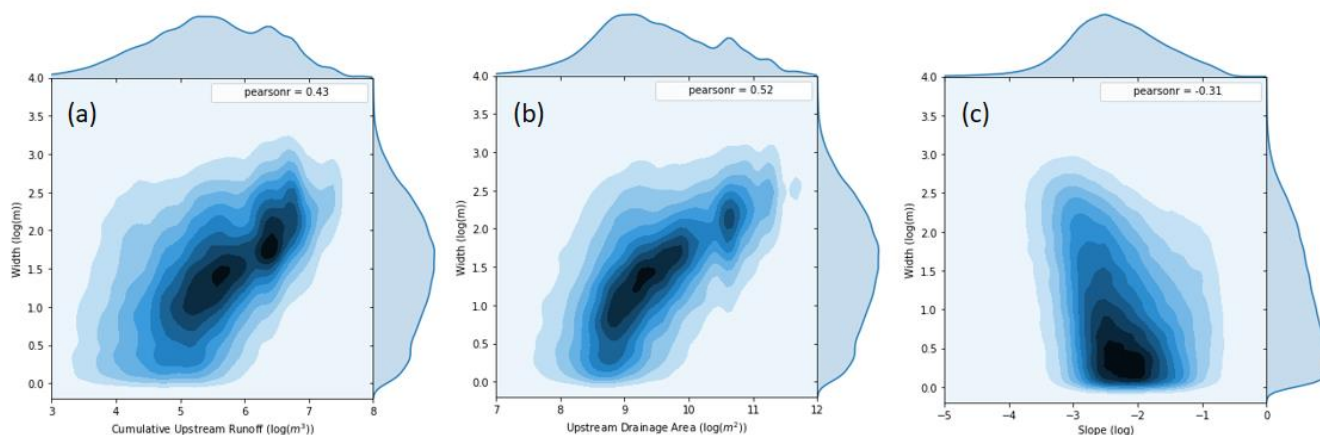

**Figure 4** The relationships between maximum river width and cumulative upstream runoff (a), upstream drainage area (b) and river gradient (c) (The color coding is related to data counts with highest in dark blue, lowest in light blue, which is corresponding to the histogram on the axes).



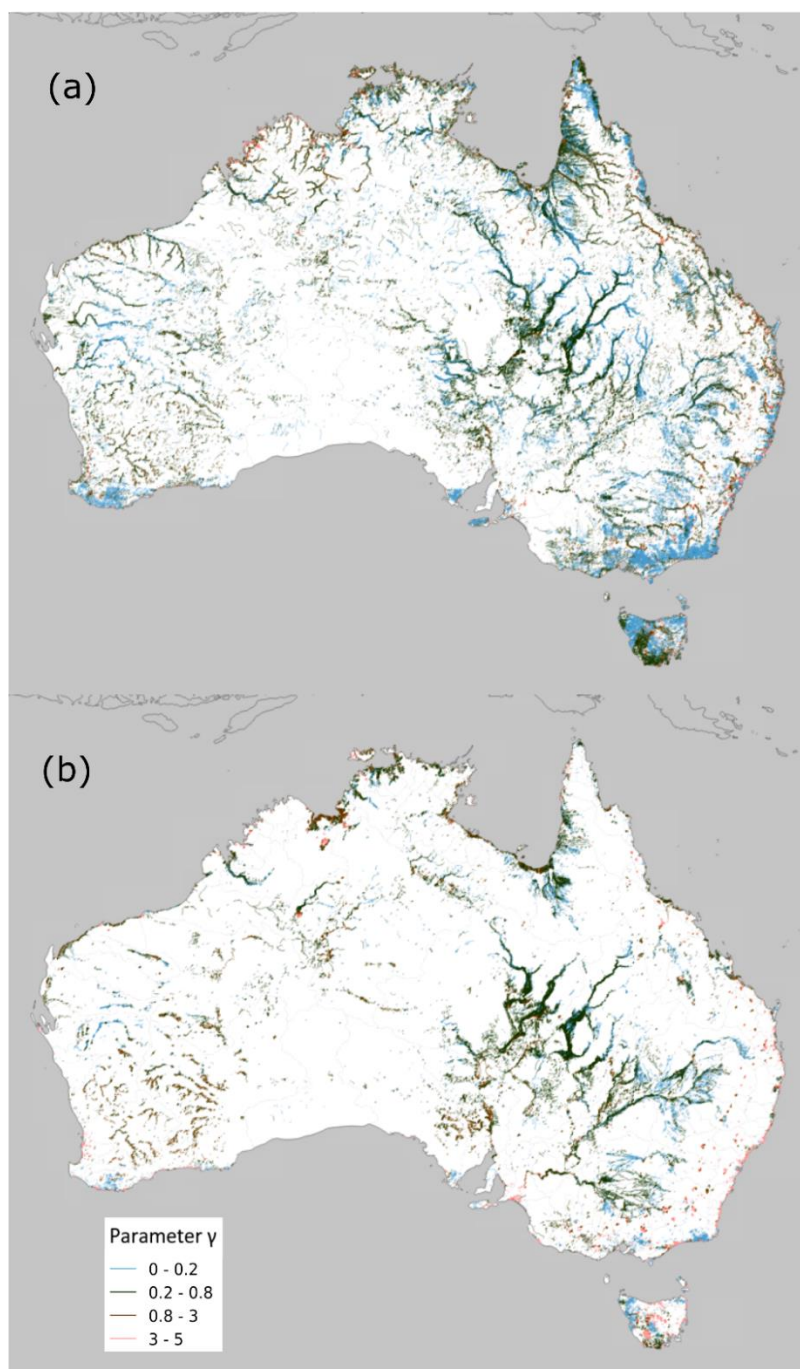

**Figure 5** River morphology classification  $\gamma$  parameter values for medium (a) and large (b) rivers for Australia.

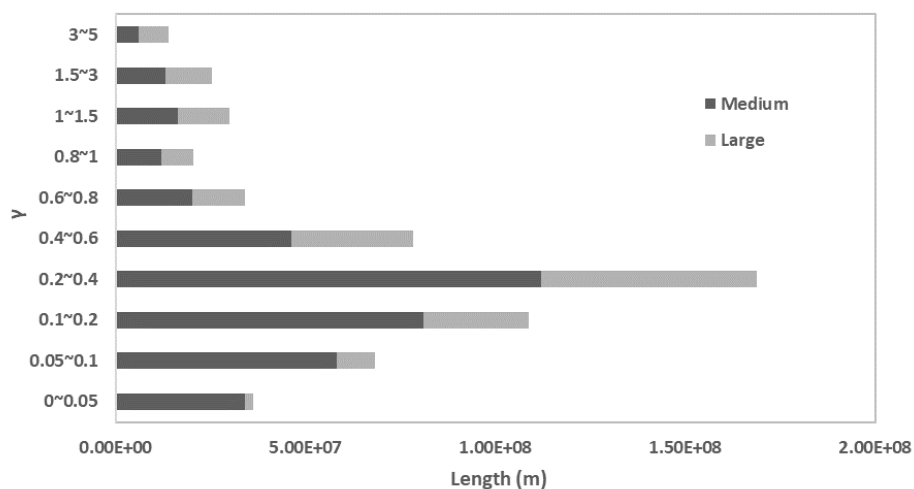

**Figure 6** The total lengths of medium and large rivers for different  $\gamma$  value ranges across Australia.

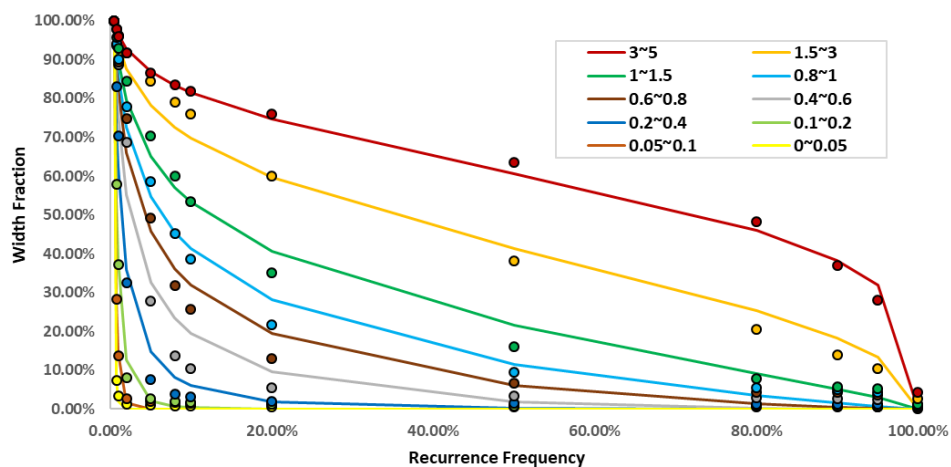

**Figure 7** Curves characteristics for different river morphology categories (line: prediction; dot: observation).

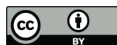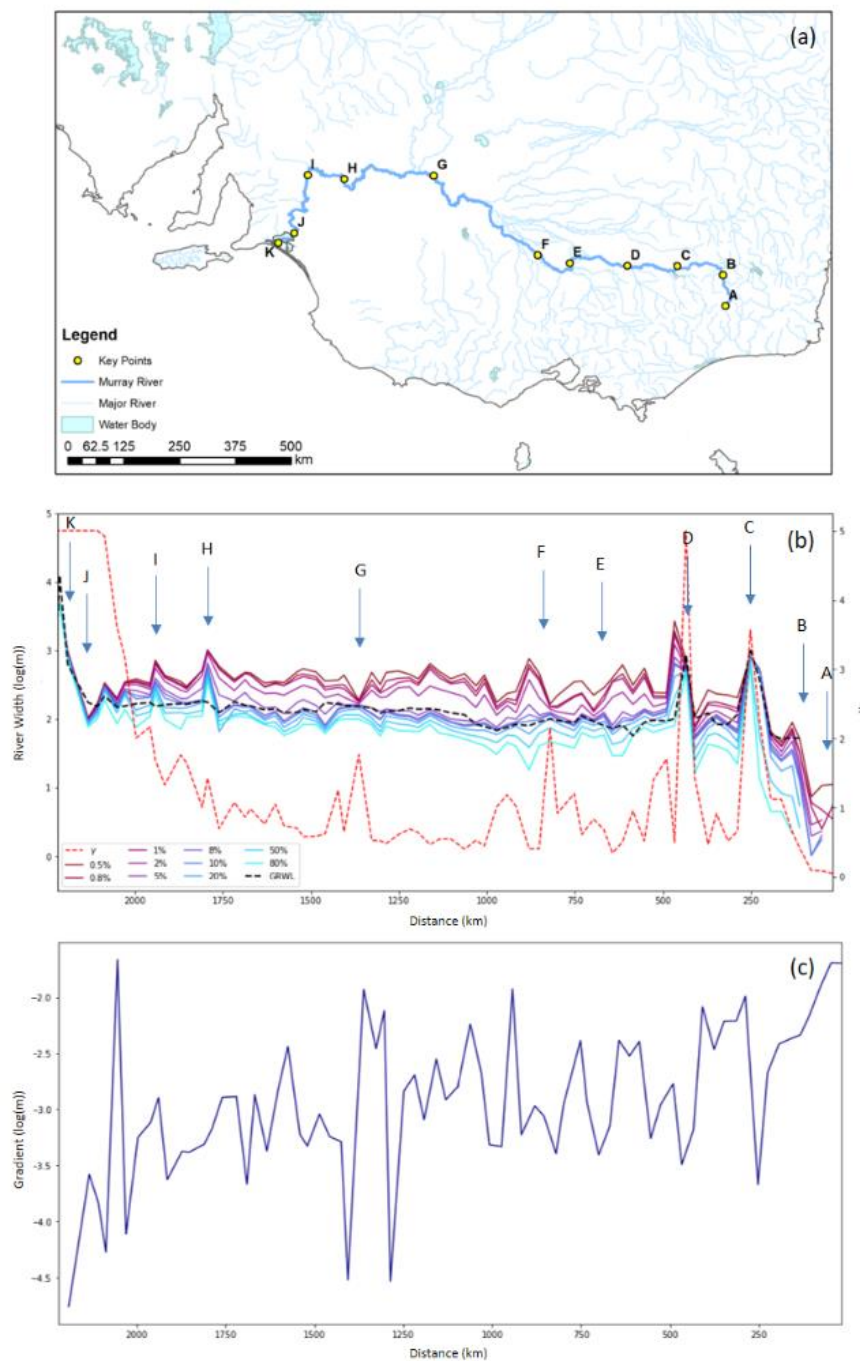

**Figure 8.** Longitudinal profile of the Murray River showing (a) location of river and selected locations; (b) profile of width at different frequencies and river morphology parameter  $\gamma$ , and (c) profile of river gradient. Values are averaged for 30 km sections along the river channel. Letters indicate: (A) source according to our data; (B) source according to GRWL data (Allen and Pavelsky, 2018); (C) Lake Hume; (D) Yarrawonga Weir; (E) and (F) anabranching locations; (G) Mildura; (H–I) Lower Murray wetlands; (J–K) Lake Alexandrina.



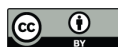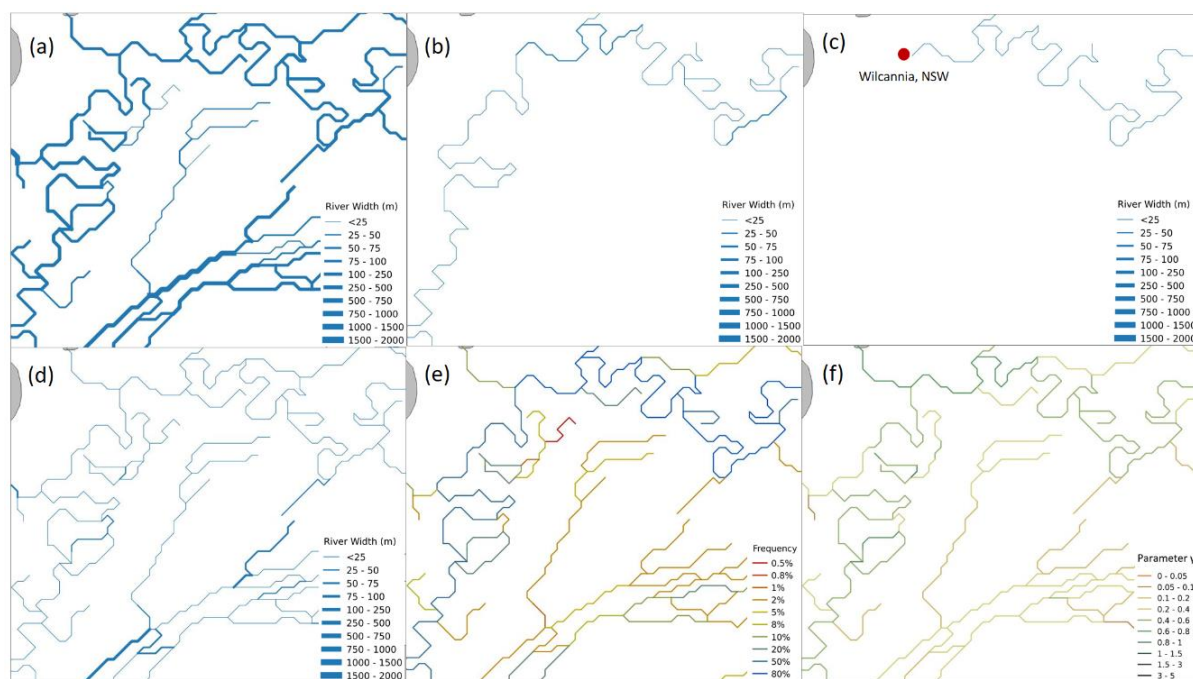

**Figure 9.** Illustration of data characteristics for an area including the Darling River and adjoining Talyawalka Creek near Wilcannia (NSW) (15.7 by 15.3 km centred on 31.62°S, 143.42°E). Shown are (a) maximum river width (0.5% frequency); (b) median width (50%); (c) minimum river width (80%), (d) least detected river width and (e) corresponding frequency; (f) hydromorphology parameter  $\gamma$ .
